# Supplementary material for: How do visible and UV light affect the structure and function of leaf-associated aquatic fungal communities polluted by TiO2 nanoparticles?
Source: Royal Society of Chemistry journal article supplement (doi:10.1039/d1en00275a), 2021-12-06
Supplement: d1en00275a1.pdf [file d1en00275a1.pdf]

## Supplementary Material

### Contents:

**Fig. S1.** Transmission electron microscopy (TEM) images of TiO<sub>2</sub> nanoparticles stock suspension.

**Fig. S2.** UV-vis spectra of TiO<sub>2</sub> nanoparticles in stream water.

**Table S1** Water quality indexes of stream water.

**Table S2** Substrates and international unit (IU) definitions of assayed enzymes.

**Table S3** The diameter, polydispersion index (PDI) and zeta-potential of TiO<sub>2</sub> nanoparticles were monitored in stream water freshly prepared (Mean ± SD, n=3)s.

**Table S4** The effective sequence tags of each fungal species obtained from each sample after 214 days of exposure to TiO<sub>2</sub> NPs under different light conditions in microcosms.

**Fig. S1.**

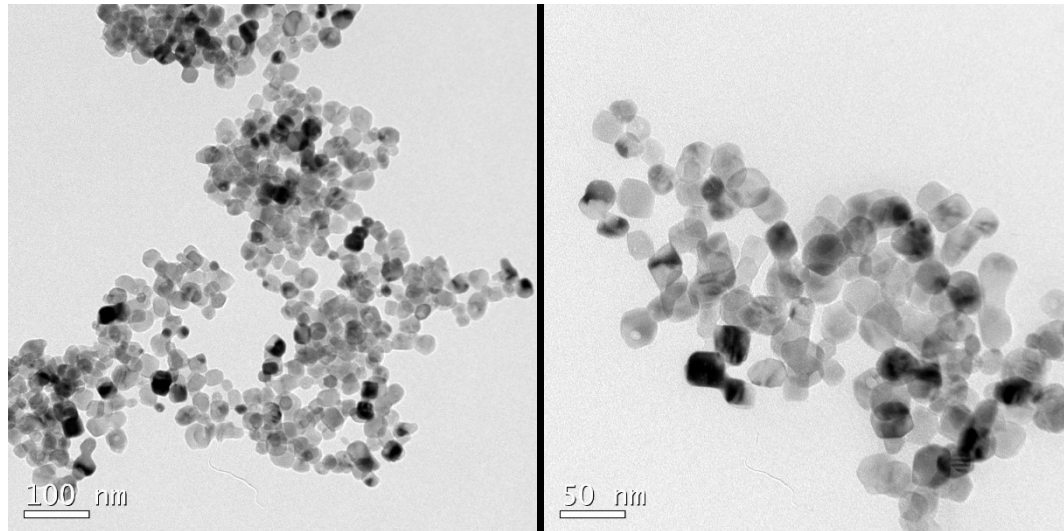

**Fig. S1.** Transmission electron microscopy (TEM) images of TiO<sub>2</sub> nanoparticle stock suspensions.

Fig. S2.

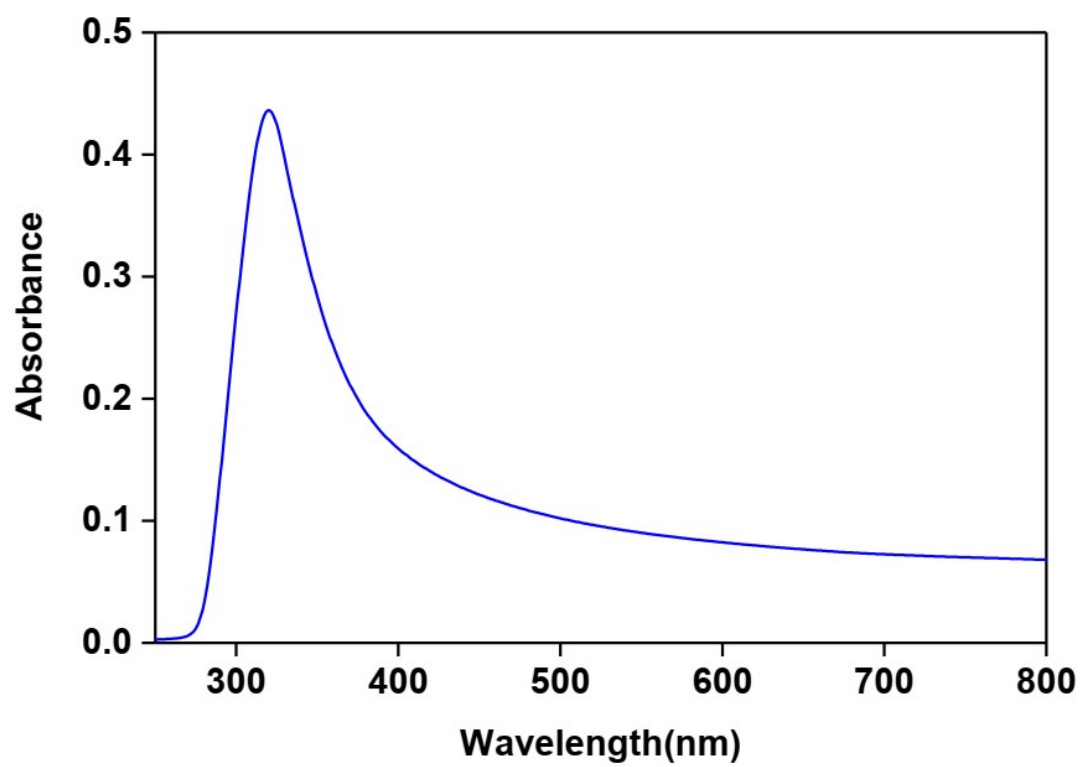

Fig. S2. UV-vis spectra of TiO<sub>2</sub> nanoparticles in stream water.

**Table S1** Water quality indexes of stream water.

| Parameters                                                | Stream water |
|-----------------------------------------------------------|--------------|
| pH                                                        | 8.37         |
| Temperature (°C)                                          | 13.6         |
| Conductivity ( $\mu\text{S cm}^{-1}$ )                    | 443.5        |
| Redox potential (mV)                                      | -70.4        |
| Dissolved oxygen (mM)                                     | 10.56        |
| Nitrate ( $\text{mg N-NO}_3^- \text{ L}^{-1}$ )           | 1.14         |
| Ammonium ( $\text{mg N-NH}_3 \text{ L}^{-1}$ )            | 0.05         |
| Orthophosphate ( $\text{mg P-PO}_4^{3-} \text{ L}^{-1}$ ) | 0.01         |

**Table S2** Substrates and international unit (IU) definitions of assayed enzymes.

| Enzyme                      | Abbreviation | Substrate                               | IU definition                                                                            |
|-----------------------------|--------------|-----------------------------------------|------------------------------------------------------------------------------------------|
| Acid phosphatase            | AP           | pNP-phosphate                           | 1 $\mu\text{mol}$ p-nitrophenol<br>released $\text{hour}^{-1} \text{g}^{-1}$ dry litter  |
| Cellobiohydrolase           | CBH          | pNP-cellobioside                        | 1 $\mu\text{mol}$ p-nitrophenol<br>released $\text{hour}^{-1} \text{g}^{-1}$ dry litter  |
| $\beta$ -glucosidase        | BG           | pNP- $\beta$ -glucopyranoside           | 1 $\mu\text{mol}$ p-nitrophenol<br>released $\text{hour}^{-1} \text{g}^{-1}$ dry litter  |
| N-<br>acetylglucosaminidase | NAG          | pNP- $\beta$ -N-<br>acetylglucosaminide | 1 $\mu\text{mol}$ p-nitrophenol<br>released $\text{hour}^{-1} \text{g}^{-1}$ dry litter  |
| Leucine-<br>aminopeptidase  | LAP          | leucine p-nitroanilide                  | 1 $\mu\text{mol}$ p-nitroaniline<br>released $\text{hour}^{-1} \text{g}^{-1}$ dry litter |
| Glycine-<br>aminopeptidase  | GAP          | glycine p-nitroanilide                  | 1 $\mu\text{mol}$ p-nitroaniline<br>released $\text{hour}^{-1} \text{g}^{-1}$ dry litter |
| Polyphenol oxidase          | PPO          | L-DOPA                                  | 1 $\mu\text{mol}$ L-DOPA released<br>$\text{hour}^{-1} \text{g}^{-1}$ dry litter         |
| Peroxidase                  | POD          | L-DOPA                                  | 1 $\mu\text{mol}$ L-DOPA released<br>$\text{hour}^{-1} \text{g}^{-1}$ dry litter         |

**Table S3** The diameter, polydispersion index (PDI) and zeta-potential of TiO<sub>2</sub> nanoparticles were monitored in stream water freshly prepared (Mean  $\pm$  SD, n=3).

| Time (d) | Treatments | Diameter (nm)                  | PdI                             | Zeta potential (mV)             |
|----------|------------|--------------------------------|---------------------------------|---------------------------------|
| 0        | L-T        | 1665 $\pm$ 178.3 <sup>a</sup>  | 1.410 $\pm$ 0.024 <sup>a</sup>  | -33.18 $\pm$ 0.90 <sup>a</sup>  |
|          | U-T        | 2204 $\pm$ 242.9 <sup>a</sup>  | 0.768 $\pm$ 0.119 <sup>b</sup>  | -17.55 $\pm$ 0.045 <sup>c</sup> |
|          | LU-T       | 2172 $\pm$ 290.4 <sup>a</sup>  | 0.521 $\pm$ 0.105 <sup>b</sup>  | -28.45 $\pm$ 0.55 <sup>b</sup>  |
| 1        | L-T        | 4231 $\pm$ 549.9 <sup>a</sup>  | 0.785 $\pm$ 0.001 <sup>a</sup>  | -12.45 $\pm$ 1.75 <sup>b</sup>  |
|          | U-T        | 3389 $\pm$ 577.8 <sup>b</sup>  | 0.687 $\pm$ 0.013 <sup>a</sup>  | -12.72 $\pm$ 0.81 <sup>b</sup>  |
|          | LU-T       | 2410 $\pm$ 403.1 <sup>c</sup>  | 0.952 $\pm$ 0.251 <sup>a</sup>  | -25.16 $\pm$ 1.20 <sup>a</sup>  |
| 3        | L-T        | 3446 $\pm$ 457.1 <sup>c</sup>  | 0.944 $\pm$ 0.170 <sup>b</sup>  | -12.15 $\pm$ 0.87 <sup>a</sup>  |
|          | U-T        | 12725 $\pm$ 177.6 <sup>a</sup> | 1.676 $\pm$ 0.599 <sup>a</sup>  | -11.86 $\pm$ 0.88 <sup>a</sup>  |
|          | LU-T       | 6144 $\pm$ 497.5 <sup>b</sup>  | 1.926 $\pm$ 0.371 <sup>a</sup>  | -10.98 $\pm$ 0.83 <sup>a</sup>  |
| 7        | L-T        | 2435 $\pm$ 151.6 <sup>b</sup>  | 1.084 $\pm$ 0.244 <sup>a</sup>  | -24.86 $\pm$ 1.34 <sup>a</sup>  |
|          | U-T        | 3187 $\pm$ 212.5 <sup>b</sup>  | 0.592 $\pm$ 0.156 <sup>b</sup>  | -15.75 $\pm$ 1.82 <sup>b</sup>  |
|          | LU-T       | 6867 $\pm$ 985.5 <sup>a</sup>  | 0.815 $\pm$ 0.250 <sup>ab</sup> | -14.97 $\pm$ 0.11 <sup>b</sup>  |

Note: Values are given as mean  $\pm$  standard error, n = 3. Different letters denote significant differences among treatments ( $P < 0.05$ ).

**Table S4** The effective sequence tags of each fungal species obtained from each sample after 214 days of exposure to TiO<sub>2</sub> NPs under different light conditions in microcosms.

|                                       | Initial | L     | L-T  | U     | U-T   | LU    | LU-T  |
|---------------------------------------|---------|-------|------|-------|-------|-------|-------|
| <i>Anguillospora_longissima</i>       | 288     | 2181  | 2779 | 20833 | 45617 | 19789 | 19681 |
| unclassified                          | 13482   | 9896  | 6277 | 12023 | 6256  | 9862  | 14980 |
| <i>Cadophora_luteoolivacea</i>        | 64      | 19975 | 368  | 104   | 469   | 4725  | 172   |
| Incertae_sedis_sp                     | 2848    | 1195  | 1490 | 4636  | 1814  | 2587  | 3645  |
| <i>Chytridiomycota_sp</i>             | 7047    | 0     | 0    | 0     | 0     | 0     | 7     |
| <i>Pleosporaceae_sp</i>               | 2461    | 411   | 3    | 130   | 69    | 332   | 2313  |
| <i>Tricladium_chaetocladium</i>       | 6       | 66    | 76   | 1717  | 607   | 142   | 354   |
| <i>Candida_intermedia</i>             | 2769    | 0     | 0    | 0     | 0     | 0     | 0     |
| <i>Penicillium_oxalicum</i>           | 1070    | 20    | 6    | 1217  | 29    | 46    | 14    |
| <i>Fusarium_solani</i>                | 289     | 36    | 76   | 625   | 100   | 33    | 149   |
| <i>Aspergillus_fumigatus</i>          | 76      | 6     | 1    | 1106  | 24    | 1     | 0     |
| <i>Phoma_herbarum</i>                 | 1       | 979   | 39   | 0     | 0     | 38    | 145   |
| <i>Microbotryomycetes_sp</i>          | 4       | 261   | 16   | 0     | 270   | 0     | 131   |
| <i>Colletotrichum_gloeosporioides</i> | 440     | 0     | 0    | 37    | 2     | 0     | 0     |
| <i>Aspergillus_niger</i>              | 340     | 1     | 0    | 0     | 0     | 0     | 32    |
| <i>Lecythophora_fasciculata</i>       | 0       | 0     | 1    | 0     | 2     | 354   | 0     |
| <i>Arthrotrys_irisidis</i>            | 0       | 0     | 335  | 0     | 1     | 0     | 0     |
| <i>Dothideomycetes_sp</i>             | 45      | 46    | 1    | 88    | 49    | 3     | 73    |
| <i>Cladosporium_cladosporioides</i>   | 192     | 15    | 7    | 54    | 27    | 0     | 10    |
| <i>Nectriaceae_sp</i>                 | 74      | 14    | 20   | 132   | 8     | 11    | 31    |
| <i>Tetracladium_marchalianum</i>      | 204     | 3     | 0    | 21    | 8     | 1     | 31    |
| <i>Sarocladium_strictum</i>           | 262     | 0     | 0    | 0     | 0     | 0     | 0     |
| <i>Rhizopus_arrhizus</i>              | 184     | 19    | 12   | 0     | 18    | 3     | 9     |
| <i>Ascomycota_sp</i>                  | 37      | 15    | 3    | 96    | 22    | 4     | 7     |
| <i>Sordariomycetes_sp</i>             | 7       | 1     | 28   | 71    | 3     | 14    | 46    |
| <i>Gibberella_fujikuroi</i>           | 153     | 0     | 0    | 0     | 0     | 0     | 0     |
| <i>Hongkongmyces_pedis</i>            | 0       | 3     | 3    | 119   | 0     | 0     | 0     |

---

|                                                 |    |    |    |    |    |    |     |
|-------------------------------------------------|----|----|----|----|----|----|-----|
| <i>Curvularia_spicifera</i>                     | 0  | 0  | 0  | 0  | 0  | 0  | 125 |
| <i>Aspergillus_flavus</i>                       | 43 | 0  | 0  | 75 | 2  | 0  | 0   |
| <i>Lasiosphaeriaceae_sp</i>                     | 0  | 31 | 0  | 80 | 3  | 0  | 0   |
| <i>Haptocillium_campanulatum</i>                | 0  | 0  | 0  | 20 | 91 | 0  | 0   |
| <i>Trichocomaceae_sp</i>                        | 15 | 0  | 0  | 59 | 1  | 33 | 0   |
| <i>Sclerotiniaceae_sp</i>                       | 0  | 8  | 25 | 65 | 1  | 0  | 9   |
| <i>Dactylella_leptospora</i>                    | 54 | 2  | 0  | 43 | 0  | 0  | 0   |
| <i>Pleosporales_sp</i>                          | 53 | 0  | 0  | 15 | 0  | 8  | 23  |
| <i>Phaeosphaeria_typharum</i>                   | 77 | 0  | 0  | 16 | 0  | 0  | 0   |
| <i>Ochroconis_mirabilis</i>                     | 85 | 0  | 0  | 0  | 0  | 0  | 0   |
| <i>Plectosphaerellaceae_sp</i>                  | 1  | 3  | 1  | 19 | 0  | 48 | 0   |
| <i>Clavispora_lusitaniae</i>                    | 0  | 0  | 0  | 58 | 0  | 2  | 0   |
| <i>Fusicolla_acetilerea</i>                     | 4  | 2  | 15 | 23 | 0  | 0  | 13  |
| <i>Agaricomycetes_sp</i>                        | 6  | 0  | 0  | 50 | 0  | 0  | 0   |
| <i>Hypocreales_sp</i>                           | 1  | 1  | 0  | 48 | 0  | 0  | 5   |
| <i>Trametes_versicolor</i>                      | 0  | 0  | 2  | 52 | 0  | 0  | 0   |
| <i>Plectosphaerella_paucisepta</i><br><i>ta</i> | 8  | 2  | 21 | 0  | 0  | 9  | 12  |
| <i>Fusarium_chlamydosporum</i>                  | 6  | 31 | 1  | 3  | 8  | 0  | 0   |
| <i>Basidiomycota_sp</i>                         | 7  | 0  | 0  | 32 | 0  | 7  | 1   |
| <i>Trichoderma_asperellum</i>                   | 0  | 0  | 0  | 36 | 0  | 0  | 6   |
| <i>Graphium_penicillioides</i>                  | 41 | 0  | 0  | 0  | 0  | 0  | 0   |
| <i>Yarrowia_lipolytica</i>                      | 0  | 6  | 7  | 27 | 0  | 0  | 0   |
| <i>Leptosphaeriaceae_sp</i>                     | 6  | 4  | 11 | 0  | 11 | 5  | 0   |
| <i>Chaetomiaceae_sp</i>                         | 0  | 0  | 0  | 0  | 0  | 5  | 31  |
| <i>Psathyrella_candolleana</i>                  | 0  | 0  | 0  | 33 | 0  | 0  | 0   |
| <i>Aspergillus_sydowii</i>                      | 2  | 0  | 3  | 21 | 0  | 5  | 2   |
| <i>Moesziomyces_bullatus</i>                    | 32 | 0  | 0  | 0  | 0  | 0  | 0   |
| <i>Parodiopsidaceae_sp</i>                      | 0  | 0  | 0  | 26 | 6  | 0  | 0   |
| <i>Eurotiomycetes_sp</i>                        | 7  | 11 | 0  | 0  | 12 | 0  | 0   |
| <i>Phlyctochytrium_aestuarii</i>                | 0  | 0  | 0  | 29 | 0  | 0  | 0   |

---



---

|                                    |    |    |    |    |    |    |    |
|------------------------------------|----|----|----|----|----|----|----|
| <i>Xeromyces_bisporus</i>          | 0  | 0  | 0  | 27 | 1  | 0  | 1  |
| <i>Khuskia_oryzae</i>              | 0  | 1  | 0  | 25 | 0  | 0  | 1  |
| <i>Aureobasidium_pullulans</i>     | 9  | 3  | 0  | 1  | 0  | 13 | 0  |
| <i>Botryosphaeria_dothidea</i>     | 0  | 22 | 0  | 0  | 0  | 0  | 0  |
| <i>Penicillium_simplicissimum</i>  | 21 | 0  | 0  | 0  | 0  | 0  | 0  |
| <i>Orbiliaceae_sp</i>              | 7  | 2  | 0  | 5  | 4  | 0  | 0  |
| <i>Ilyonectria_radicalicola</i>    | 0  | 0  | 1  | 16 | 0  | 0  | 1  |
| <i>Paraphaeosphaeria_sporulosa</i> | 17 | 0  | 0  | 0  | 0  | 0  | 0  |
| <i>Clavaria_falcata</i>            | 0  | 0  | 0  | 0  | 17 | 0  | 0  |
| <i>Malassezia_restricta</i>        | 1  | 3  | 0  | 0  | 8  | 0  | 4  |
| <i>Spizellomycetaceae_sp</i>       | 0  | 0  | 0  | 0  | 15 | 0  | 0  |
| <i>Aspergillus_repens</i>          | 0  | 0  | 0  | 0  | 0  | 0  | 15 |
| <i>Archaeorhizomycetaceae_sp</i>   | 0  | 0  | 0  | 0  | 15 | 0  | 0  |
| <i>Trichoderma_phellinicola</i>    | 0  | 0  | 15 | 0  | 0  | 0  | 0  |
| <i>Zymoseptoria_passerinii</i>     | 10 | 0  | 0  | 0  | 0  | 0  | 4  |
| <i>Talaromyces_radicus</i>         | 12 | 0  | 0  | 0  | 0  | 2  | 0  |
| <i>Glomerales_sp</i>               | 0  | 0  | 0  | 14 | 0  | 0  | 0  |
| <i>Cirrenalia_macrocephala</i>     | 1  | 0  | 0  | 0  | 9  | 3  | 0  |
| <i>Phaeosphaeria_pontiformis</i>   | 7  | 0  | 0  | 0  | 0  | 6  | 0  |
| <i>Chaetomium_thermophilum</i>     | 0  | 0  | 0  | 13 | 0  | 0  | 0  |
| <i>Passalora_intermedia</i>        | 0  | 0  | 0  | 0  | 13 | 0  | 0  |
| <i>Pseudohalonestria_lignicola</i> | 0  | 2  | 9  | 0  | 0  | 1  | 0  |
| <i>Massarinaceae_sp</i>            | 2  | 0  | 0  | 0  | 0  | 0  | 8  |
| <i>Alternaria_brassicicola</i>     | 9  | 0  | 0  | 0  | 0  | 0  | 1  |
| <i>Phaeomyces_kuwaitiensis</i>     | 0  | 7  | 0  | 0  | 0  | 3  | 0  |
| <i>Mortierellaceae_sp</i>          | 0  | 1  | 0  | 8  | 0  | 1  | 0  |
| <i>Issatchenkia_terricola</i>      | 0  | 0  | 0  | 9  | 0  | 0  | 0  |
| <i>Cladosporium_sphaerospermum</i> | 2  | 2  | 0  | 0  | 0  | 0  | 4  |
| <i>Aspergillus_tamaris</i>         | 8  | 0  | 0  | 0  | 0  | 0  | 0  |
| <i>Limnoperdon_incarnatum</i>      | 0  | 0  | 7  | 0  | 0  | 0  | 0  |

---

---

|                                         |   |   |   |   |   |   |   |
|-----------------------------------------|---|---|---|---|---|---|---|
| <i>Rhizopus_microsporus</i>             | 0 | 0 | 7 | 0 | 0 | 0 | 0 |
| <i>Trichoderma_citrinoviride</i>        | 0 | 0 | 0 | 0 | 7 | 0 | 0 |
| <i>Neopestalotiopsis_clavispora</i>     | 7 | 0 | 0 | 0 | 0 | 0 | 0 |
| <i>Talaromyces_funiculosus</i>          | 6 | 0 | 0 | 0 | 0 | 0 | 0 |
| <i>Leucosporidiella_creatinivora</i>    | 5 | 0 | 0 | 0 | 0 | 0 | 0 |
| <i>Rhizophydiaceae_sp</i>               | 5 | 0 | 0 | 0 | 0 | 0 | 0 |
| <i>Metschnikowiaceae_sp</i>             | 4 | 0 | 0 | 0 | 0 | 1 | 0 |
| <i>Stachybotrys_longispora</i>          | 0 | 0 | 0 | 0 | 0 | 5 | 0 |
| <i>Herpotrichiellaceae_sp</i>           | 0 | 0 | 0 | 0 | 0 | 0 | 5 |
| <i>Gliocephalotrichum_longibrachium</i> | 0 | 0 | 0 | 0 | 5 | 0 | 0 |
| <i>Fusarium_oxysporum</i>               | 0 | 2 | 3 | 0 | 0 | 0 | 0 |
| <i>Montagnulaceae_sp</i>                | 3 | 0 | 0 | 1 | 0 | 0 | 0 |
| <i>Alternaria_pluriseptata</i>          | 1 | 0 | 0 | 3 | 0 | 0 | 0 |
| <i>Tremellomycetes_sp</i>               | 2 | 2 | 0 | 0 | 0 | 0 | 0 |
| <i>Rhodotorula_mucilaginosa</i>         | 0 | 0 | 3 | 0 | 0 | 1 | 0 |
| <i>Davidiellaceae_sp</i>                | 1 | 0 | 0 | 0 | 0 | 3 | 0 |
| <i>Betamyces_americaemeridionalis</i>   | 4 | 0 | 0 | 0 | 0 | 0 | 0 |
| <i>Psathyrella_pygmaea</i>              | 0 | 0 | 4 | 0 | 0 | 0 | 0 |
| <i>Flagellospora_leucorhynchos</i>      | 0 | 3 | 1 | 0 | 0 | 0 | 0 |
| <i>Phyllosticta_capitalensis</i>        | 0 | 3 | 0 | 0 | 0 | 0 | 0 |
| <i>Sporobolomyces_oryzicola</i>         | 3 | 0 | 0 | 0 | 0 | 0 | 0 |
| <i>Mortierella_alpina</i>               | 0 | 2 | 0 | 0 | 0 | 0 | 1 |
| <i>Boliniaceae_sp</i>                   | 0 | 0 | 0 | 0 | 0 | 0 | 3 |
| <i>Staphylotrichum_coccosporum</i>      | 0 | 0 | 0 | 0 | 0 | 0 | 3 |
| <i>Rhodotorula_glutinis</i>             | 0 | 3 | 0 | 0 | 0 | 0 | 0 |
| <i>Chaetomium_globosum</i>              | 0 | 1 | 2 | 0 | 0 | 0 | 0 |
| <i>Aspergillus_penicillioides</i>       | 0 | 0 | 0 | 0 | 0 | 0 | 3 |
| <i>Alternaria_brassicae</i>             | 1 | 0 | 0 | 0 | 0 | 0 | 2 |
| <i>Keissleriella_trichophoricola</i>    | 3 | 0 | 0 | 0 | 0 | 0 | 0 |
| <i>Arthrobotrys_eudermata</i>           | 2 | 0 | 0 | 0 | 0 | 0 | 0 |

---

---

|                                         |   |   |   |   |   |   |   |
|-----------------------------------------|---|---|---|---|---|---|---|
| <i>Bionectriaceae_sp</i>                | 1 | 1 | 0 | 0 | 0 | 0 | 0 |
| <i>Leptospora_rubella</i>               | 2 | 0 | 0 | 0 | 0 | 0 | 0 |
| <i>Monographella_cucumerina</i>         | 1 | 0 | 0 | 0 | 0 | 1 | 0 |
| <i>Mortierellales_sp</i>                | 0 | 0 | 0 | 0 | 0 | 0 | 2 |
| <i>Kazachstania_unispora</i>            | 0 | 0 | 0 | 0 | 0 | 0 | 2 |
| <i>Colletotrichum_truncatum</i>         | 0 | 2 | 0 | 0 | 0 | 0 | 0 |
| <i>Malasseziaceae_sp</i>                | 0 | 1 | 0 | 0 | 0 | 0 | 1 |
| <i>Xylariaceae_sp</i>                   | 0 | 0 | 0 | 0 | 2 | 0 | 0 |
| <i>Gibellulopsis_nigrescens</i>         | 0 | 2 | 0 | 0 | 0 | 0 | 0 |
| <i>Aspergillus_lentulus</i>             | 2 | 0 | 0 | 0 | 0 | 0 | 0 |
| <i>Ramularia_pratensis</i>              | 0 | 2 | 0 | 0 | 0 | 0 | 0 |
| <i>Bjerkandera_adusta</i>               | 0 | 0 | 2 | 0 | 0 | 0 | 0 |
| <i>Pyrenochaeta_unguis-hominis</i>      | 0 | 2 | 0 | 0 | 0 | 0 | 0 |
| <i>Ascobolaceae_sp</i>                  | 0 | 0 | 0 | 0 | 2 | 0 | 0 |
| <i>Helotiales_sp</i>                    | 2 | 0 | 0 | 0 | 0 | 0 | 0 |
| <i>Trichosporon_asteroides</i>          | 0 | 0 | 0 | 2 | 0 | 0 | 0 |
| <i>Penicillium_canescens</i>            | 0 | 0 | 2 | 0 | 0 | 0 | 0 |
| <i>Vibrisseaceae_sp</i>                 | 0 | 2 | 0 | 0 | 0 | 0 | 0 |
| <i>Sclerostagonospora_phragmiticola</i> | 0 | 0 | 0 | 0 | 0 | 0 | 2 |
| <i>Nectria_diminuta</i>                 | 1 | 0 | 0 | 0 | 0 | 0 | 0 |
| <i>Volutella_citrinella</i>             | 0 | 0 | 0 | 1 | 0 | 0 | 0 |
| <i>Lophiostomataceae_sp</i>             | 0 | 1 | 0 | 0 | 0 | 0 | 0 |
| <i>Dictyosporium_giganticum</i>         | 1 | 0 | 0 | 0 | 0 | 0 | 0 |
| <i>Setoseptoria_phragmitis</i>          | 0 | 0 | 0 | 0 | 1 | 0 | 0 |
| <i>Coprinopsis_atramentaria</i>         | 0 | 0 | 0 | 0 | 0 | 0 | 1 |
| <i>Dactylellina_phymatopaga</i>         | 0 | 0 | 0 | 1 | 0 | 0 | 0 |
| <i>Hypocreaceae_sp</i>                  | 0 | 0 | 0 | 1 | 0 | 0 | 0 |
| <i>Tilletiopsis_washingtonensis</i>     | 0 | 0 | 0 | 0 | 0 | 0 | 1 |
| <i>Pleurotus_cornucopiae</i>            | 1 | 0 | 0 | 0 | 0 | 0 | 0 |
| <i>Sporidiobolus_pararoseus</i>         | 0 | 1 | 0 | 0 | 0 | 0 | 0 |

---

---

|                                        |   |   |   |   |   |   |   |
|----------------------------------------|---|---|---|---|---|---|---|
| <i>Colletotrichum_chlorophyti</i>      | 0 | 0 | 0 | 1 | 0 | 0 | 0 |
| <i>Alternaria_alternata</i>            | 0 | 0 | 0 | 0 | 0 | 0 | 1 |
| <i>Sporobolomyces_symmetricus</i>      | 1 | 0 | 0 | 0 | 0 | 0 | 0 |
| <i>Alternaria_gaisen</i>               | 1 | 0 | 0 | 0 | 0 | 0 | 0 |
| <i>Cryptococcus_albidus</i>            | 1 | 0 | 0 | 0 | 0 | 0 | 0 |
| <i>Fusarium_incarnatum</i>             | 0 | 1 | 0 | 0 | 0 | 0 | 0 |
| <i>Setophaeosphaeria_badalingensis</i> | 0 | 0 | 0 | 0 | 0 | 0 | 0 |
| <i>Cystobasidium_sloffiae</i>          | 0 | 0 | 0 | 0 | 0 | 0 | 0 |
| <i>Emericellopsis_humicola</i>         | 0 | 0 | 0 | 0 | 0 | 0 | 0 |
| <i>Corallomycetella_repens</i>         | 0 | 0 | 0 | 0 | 0 | 0 | 0 |
| <i>Ceratobasidiaceae_sp</i>            | 0 | 0 | 0 | 0 | 0 | 0 | 0 |
| <i>Psathyrella_stercoraria</i>         | 0 | 0 | 0 | 0 | 0 | 0 | 0 |
| <i>Cylindrotrichum_ellisii</i>         | 0 | 0 | 0 | 0 | 0 | 0 | 0 |
| <i>Acremonium_hyalinulum</i>           | 0 | 0 | 0 | 0 | 0 | 0 | 0 |
| <i>Cercospora_penzigii</i>             | 0 | 0 | 0 | 0 | 0 | 0 | 0 |
| <i>Curvularia_lunata</i>               | 0 | 0 | 0 | 0 | 0 | 0 | 0 |
| <i>Humicola_fuscoatra</i>              | 0 | 0 | 0 | 0 | 0 | 0 | 0 |
| <i>Psathyrellaceae_sp</i>              | 0 | 0 | 0 | 0 | 0 | 0 | 0 |
| <i>Paramicrothyrium_chinensis</i>      | 0 | 0 | 0 | 0 | 0 | 0 | 0 |
| <i>Fusarium_poae</i>                   | 0 | 0 | 0 | 0 | 0 | 0 | 0 |
| <i>Orbiliomycetes_sp</i>               | 0 | 0 | 0 | 0 | 0 | 0 | 0 |
| <i>Hydropisphaera_erubescens</i>       | 0 | 0 | 0 | 0 | 0 | 0 | 0 |
| <i>Sordariales_sp</i>                  | 0 | 0 | 0 | 0 | 0 | 0 | 0 |
| <i>Agaricaceae_sp</i>                  | 0 | 0 | 0 | 0 | 0 | 0 | 0 |
| <i>Pseudozyma_rugulosa</i>             | 0 | 0 | 0 | 0 | 0 | 0 | 0 |
| <i>Microascus_brevicaulis</i>          | 0 | 0 | 0 | 0 | 0 | 0 | 0 |
| <i>Phaeosphaeriaceae_sp</i>            | 0 | 0 | 0 | 0 | 0 | 0 | 0 |
| <i>Septoria_arundinacea</i>            | 0 | 0 | 0 | 0 | 0 | 0 | 0 |
| <i>Microsphaeropsis_arundinis</i>      | 0 | 0 | 0 | 0 | 0 | 0 | 0 |
| <i>Ophiosphaerella_agrostidis</i>      | 0 | 0 | 0 | 0 | 0 | 0 | 0 |

---

---

|                                    |   |   |   |   |   |   |   |
|------------------------------------|---|---|---|---|---|---|---|
| <i>Stephanonectria_keithii</i>     | 0 | 0 | 0 | 0 | 0 | 0 | 0 |
| <i>Chaetothyriaceae_sp</i>         | 0 | 0 | 0 | 0 | 0 | 0 | 0 |
| <i>Russula_livescens</i>           | 0 | 0 | 0 | 0 | 0 | 0 | 0 |
| <i>Eurotiales_sp</i>               | 0 | 0 | 0 | 0 | 0 | 0 | 0 |
| <i>Farlowiella_carmichaeliana</i>  | 0 | 0 | 0 | 0 | 0 | 0 | 0 |
| <i>Phlebia_caspica</i>             | 0 | 0 | 0 | 0 | 0 | 0 | 0 |
| <i>Setomelanomma_holmii</i>        | 0 | 0 | 0 | 0 | 0 | 0 | 0 |
| <i>Coprinellus_callinus</i>        | 0 | 0 | 0 | 0 | 0 | 0 | 0 |
| <i>Agaricales_sp</i>               | 0 | 0 | 0 | 0 | 0 | 0 | 0 |
| <i>Penicillium_chrysogenum</i>     | 0 | 0 | 0 | 0 | 0 | 0 | 0 |
| <i>Leotiomyces_sp</i>              | 0 | 0 | 0 | 0 | 0 | 0 | 0 |
| <i>Phoma_medicaginis</i>           | 0 | 0 | 0 | 0 | 0 | 0 | 0 |
| <i>Ochroconis_tshawytschae</i>     | 0 | 0 | 0 | 0 | 0 | 0 | 0 |
| <i>Septoriella_oudemansii</i>      | 0 | 0 | 0 | 0 | 0 | 0 | 0 |
| <i>Orbiliales_sp</i>               | 0 | 0 | 0 | 0 | 0 | 0 | 0 |
| <i>Fusariella_sinensis</i>         | 0 | 0 | 0 | 0 | 0 | 0 | 0 |
| <i>Edenia_gomezpompae</i>          | 0 | 0 | 0 | 0 | 0 | 0 | 0 |
| <i>Dermateaceae_sp</i>             | 0 | 0 | 0 | 0 | 0 | 0 | 0 |
| <i>Haptocillium_balanoides</i>     | 0 | 0 | 0 | 0 | 0 | 0 | 0 |
| <i>Claviceps_purpurea</i>          | 0 | 0 | 0 | 0 | 0 | 0 | 0 |
| <i>Acremonium_pilosum</i>          | 0 | 0 | 0 | 0 | 0 | 0 | 0 |
| <i>Scolecobasidium_constrictum</i> | 0 | 0 | 0 | 0 | 0 | 0 | 0 |
| <i>Xerochrysium_xerophilum</i>     | 0 | 0 | 0 | 0 | 0 | 0 | 0 |
| <i>Melampsoraceae_sp</i>           | 0 | 0 | 0 | 0 | 0 | 0 | 0 |
| <i>Tricholomataceae_sp</i>         | 0 | 0 | 0 | 0 | 0 | 0 | 0 |
| <i>Aphanoascus_keratinophilus</i>  | 0 | 0 | 0 | 0 | 0 | 0 | 0 |
| <i>Remispora_stellata</i>          | 0 | 0 | 0 | 0 | 0 | 0 | 0 |
| <i>Tetraplophaeria_tetraploa</i>   | 0 | 0 | 0 | 0 | 0 | 0 | 0 |
| <i>Aquanectria_penicillioides</i>  | 0 | 0 | 0 | 0 | 0 | 0 | 0 |
| <i>Cryptococcus_flavus</i>         | 0 | 0 | 0 | 0 | 0 | 0 | 0 |

---

---

|                                 |   |   |   |   |   |   |   |
|---------------------------------|---|---|---|---|---|---|---|
| <i>Stachybotrys_nephrospora</i> | 0 | 0 | 0 | 0 | 0 | 0 | 0 |
| <i>Hypoxylon_perforatum</i>     | 0 | 0 | 0 | 0 | 0 | 0 | 0 |
| <i>Gibberella_zeae</i>          | 0 | 0 | 0 | 0 | 0 | 0 | 0 |
| <i>Sporormiella_minima</i>      | 0 | 0 | 0 | 0 | 0 | 0 | 0 |
| <i>Arthrographis_kalrae</i>     | 0 | 0 | 0 | 0 | 0 | 0 | 0 |
| <i>Pseudallescheria_fimeti</i>  | 0 | 0 | 0 | 0 | 0 | 0 | 0 |
| <i>Myrothecium_verrucaria</i>   | 0 | 0 | 0 | 0 | 0 | 0 | 0 |
| <i>Alternaria_tenuissima</i>    | 0 | 0 | 0 | 0 | 0 | 0 | 0 |
| <i>Corynesporascaceae_sp</i>    | 0 | 0 | 0 | 0 | 0 | 0 | 0 |
| <i>Trichomerium_foliicola</i>   | 0 | 0 | 0 | 0 | 0 | 0 | 0 |
| <i>Orbilia_auricolor</i>        | 0 | 0 | 0 | 0 | 0 | 0 | 0 |
| <i>Alternaria_porri</i>         | 0 | 0 | 0 | 0 | 0 | 0 | 0 |
| <i>Tingoldiigo_graminicola</i>  | 0 | 0 | 0 | 0 | 0 | 0 | 0 |
| <i>Natantispora_unipolaris</i>  | 0 | 0 | 0 | 0 | 0 | 0 | 0 |
| <i>Mortierella_elongata</i>     | 0 | 0 | 0 | 0 | 0 | 0 | 0 |
| <i>Acremonium_alcalophilum</i>  | 0 | 0 | 0 | 0 | 0 | 0 | 0 |
| <i>Myrothecium_roridum</i>      | 0 | 0 | 0 | 0 | 0 | 0 | 0 |
| <i>Microascales_sp</i>          | 0 | 0 | 0 | 0 | 0 | 0 | 0 |
| <i>Myrothecium_carmichaelii</i> | 0 | 0 | 0 | 0 | 0 | 0 | 0 |
| <i>Talaromyces_marneffeii</i>   | 0 | 0 | 0 | 0 | 0 | 0 | 0 |
| <i>Tropicoporus_linteus</i>     | 0 | 0 | 0 | 0 | 0 | 0 | 0 |
| <i>Apiospora_montagnei</i>      | 0 | 0 | 0 | 0 | 0 | 0 | 0 |
| <i>Magnaporthaceae_sp</i>       | 0 | 0 | 0 | 0 | 0 | 0 | 0 |
| <i>Fusarium_ciliatum</i>        | 0 | 0 | 0 | 0 | 0 | 0 | 0 |
| <i>Leucothecium_emdenii</i>     | 0 | 0 | 0 | 0 | 0 | 0 | 0 |
| <i>Dipodascus_geotrichum</i>    | 0 | 0 | 0 | 0 | 0 | 0 | 0 |
| <i>Rhodotorula_minuta</i>       | 0 | 0 | 0 | 0 | 0 | 0 | 0 |
| <i>Cystostereaceae_sp</i>       | 0 | 0 | 0 | 0 | 0 | 0 | 0 |
| <i>Lasiodiplodia_theobromae</i> | 0 | 0 | 0 | 0 | 0 | 0 | 0 |
| <i>Fibroporia_vaillantii</i>    | 0 | 0 | 0 | 0 | 0 | 0 | 0 |

---

---

|                                  |   |   |   |   |   |   |   |
|----------------------------------|---|---|---|---|---|---|---|
| <i>Amarenomyces_ammophilae</i>   | 0 | 0 | 0 | 0 | 0 | 0 | 0 |
| <i>Onygenaceae_sp</i>            | 0 | 0 | 0 | 0 | 0 | 0 | 0 |
| <i>Amniculicolaceae_sp</i>       | 0 | 0 | 0 | 0 | 0 | 0 | 0 |
| <i>Wettsteinina_lacustris</i>    | 0 | 0 | 0 | 0 | 0 | 0 | 0 |
| <i>Meyerozyma_guilliermondii</i> | 0 | 0 | 0 | 0 | 0 | 0 | 0 |
| <i>Hansfordia_pulvinata</i>      | 0 | 0 | 0 | 0 | 0 | 0 | 0 |
| <i>Sarocladium_zeae</i>          | 0 | 0 | 0 | 0 | 0 | 0 | 0 |
| <i>Alphamyces_chaetifer</i>      | 0 | 0 | 0 | 0 | 0 | 0 | 0 |
| <i>Talaromyces_aurantiacus</i>   | 0 | 0 | 0 | 0 | 0 | 0 | 0 |
| <i>Schizophyllum_commune</i>     | 0 | 0 | 0 | 0 | 0 | 0 | 0 |
| <i>Endochytriaceae_sp</i>        | 0 | 0 | 0 | 0 | 0 | 0 | 0 |

---
